# Supplementary material for: Electrospun nanofibers with both surface nanopores and internal interpenetrated nanochannels for oil absorption
Source: Royal Society of Chemistry journal article supplement (doi:10.1039/c6ra00678g), 2016-01-01
Supplement: c6ra00678g2.pdf [file c6ra00678g2.pdf]

## Electrospun Nanofibers with Both Surface Nanopores and Internal Interpenetrated Nanochannels for Oil Absorption

Jipeng Guan,<sup>†,‡,§</sup> Yongjin Li,<sup>\*,†</sup> and Jingye Li<sup>\*,‡</sup>

**Table S1.** The weight loss calculation of electrospun fibers before and after etching

| Sample     | Weight Before etching (mg) | Weight After etching (mg) | Weight loss (%) |              |
|------------|----------------------------|---------------------------|-----------------|--------------|
| Spun 30/70 | 60.0                       | 42.1                      | 29.83           |              |
|            | 58.0                       | 40.8                      | 29.66           | 29.60 ± 0.23 |
|            | 86.0                       | 60.8                      | 29.30           |              |
| Spun 50/50 | 42.6                       | 22.3                      | 47.65           |              |
|            | 56.1                       | 29.1                      | 48.13           | 48.31 ± 0.57 |
|            | 83.2                       | 42.3                      | 49.16           |              |
| Spun 70/30 | 127.1                      | 39.5                      | 68.92           |              |
|            | 100.6                      | 31.8                      | 68.39           | 68.87 ± 0.38 |
|            | 98.4                       | 30.2                      | 69.31           |              |

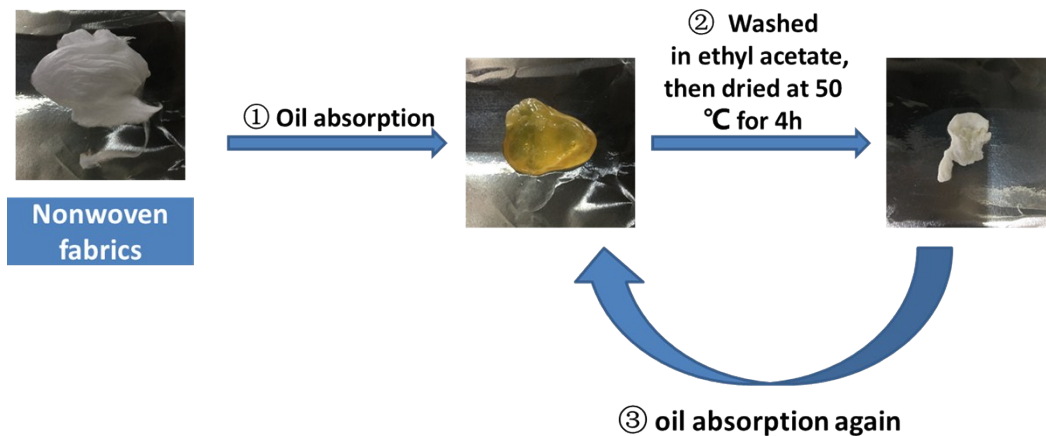

Figure S1 the schematic diagram of oil absorption experiment of the materials

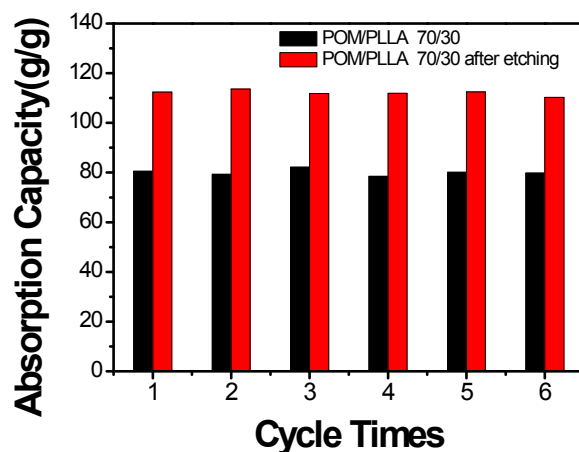

Figure S2 the reusable performance of the materials for oil absorption
